# Supplementary material for: Pore diameter control in anodic titanium and aluminium oxides
Source: Royal Society of Chemistry journal article supplement (doi:10.1039/c0jm02521f), 2010-10-22
Supplement: c0jm02521f.pdf [file c0jm02521f.pdf]

## Supplementary Information

### Pore Diameter Control in Anodic Titanium and Aluminium Oxides

Zixue Su, and Wuzong Zhou\*

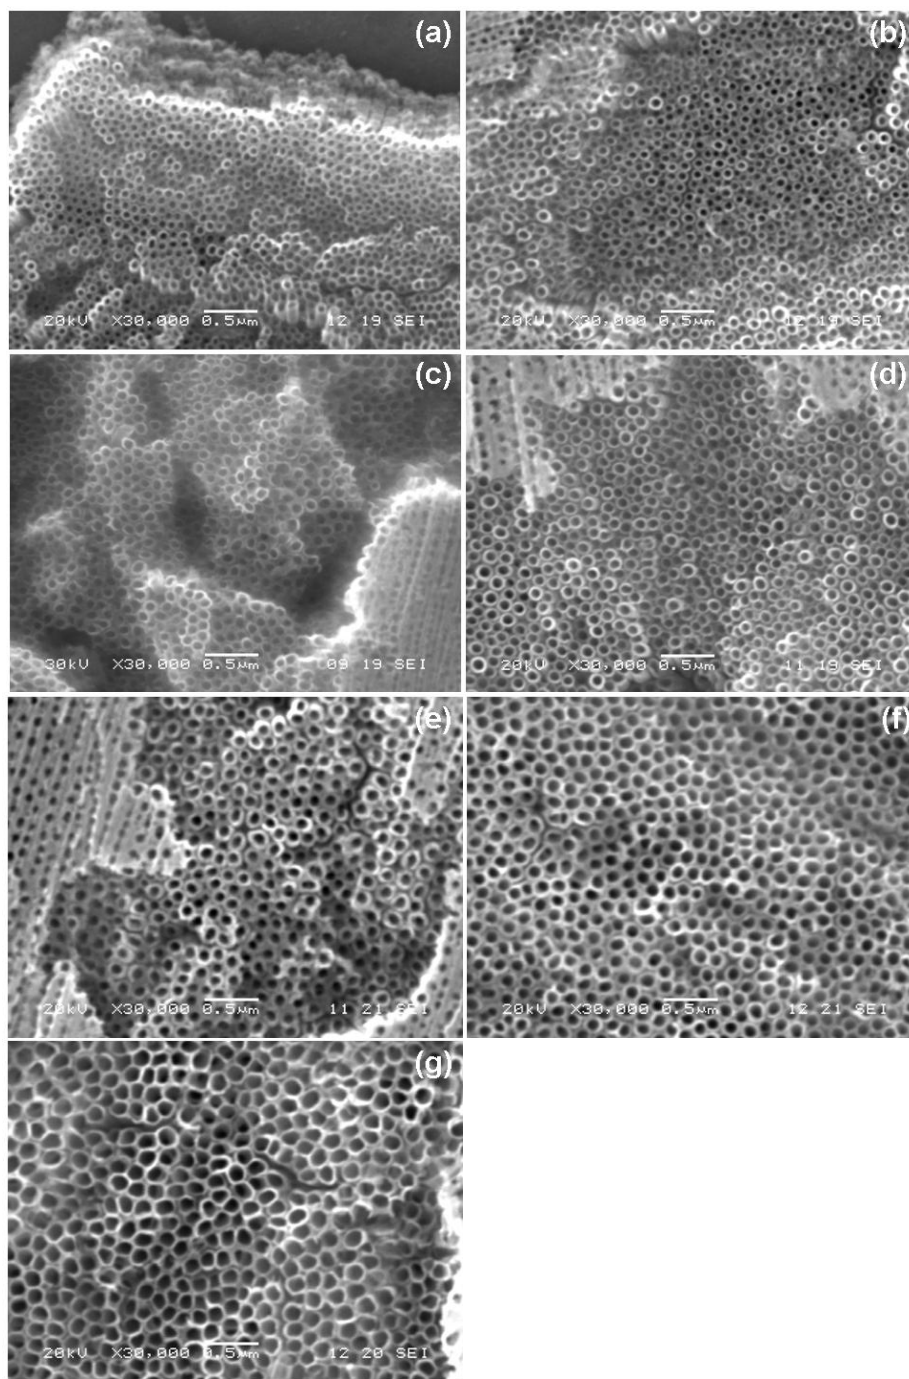

Fig. S1. SEM images of the top surface of as-prepared ATO films under different voltages, (a) 40, (b) 50, (c) 60, (d) 70, (e) 80, (f) 90 and (g) 100 V.

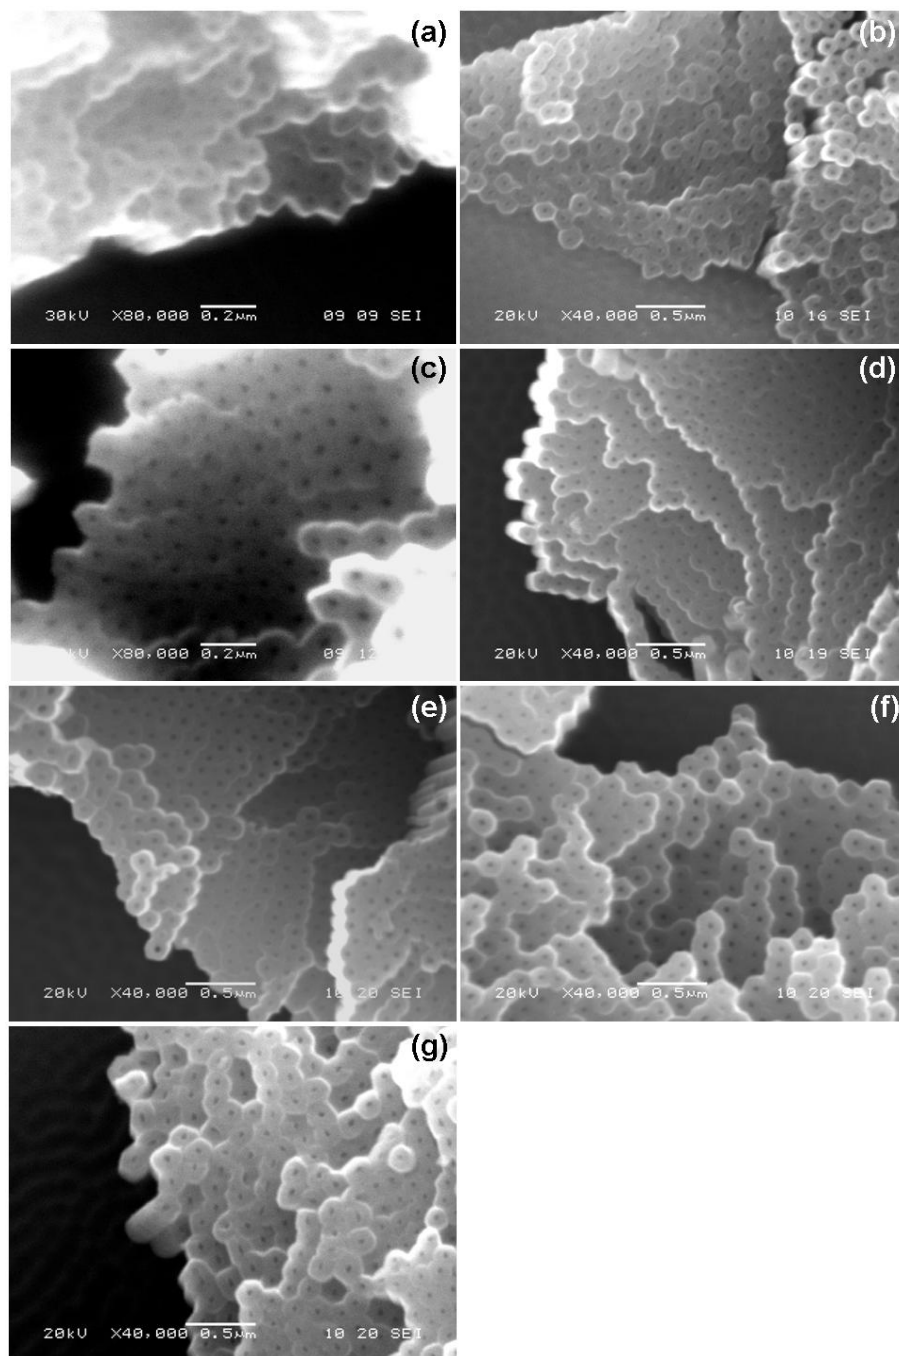

Fig. S2. SEM images of the near bottom layer of the ATO films prepared under different voltages, (a) 40, (b) 50, (c) 60, (d) 70, (e) 80, (f) 90 and (g) 100 V.

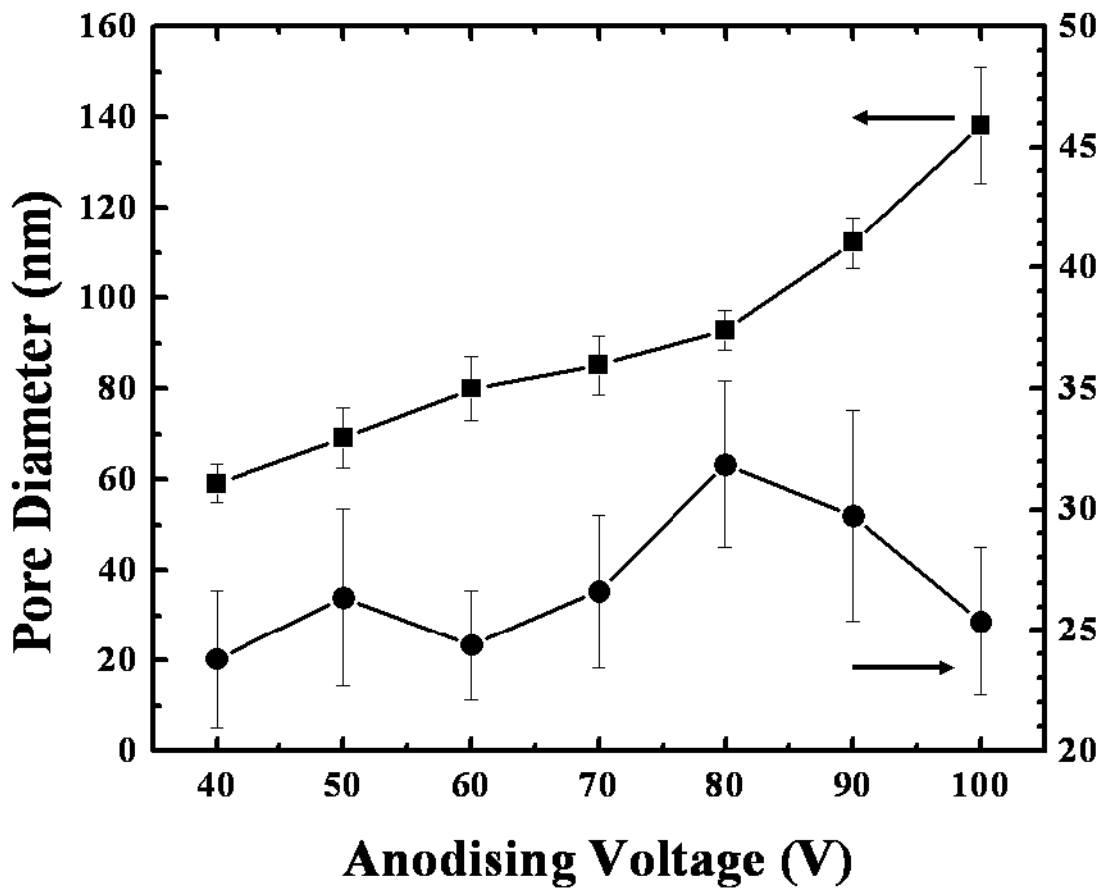

Fig. S3. Measured pore sizes from Fig. S1 (solid squares, left scale) and S2 (solid circles, right scale). For each sample, 20 pores were measured and the average value was presented in the diagram.
